# Supplementary material
Source: publisher site journal article supplement (https://e-cmh.org/upload/media/cmh-2023-0035-Supplementary-Fig-2.pdf)
Supplement: Supplementary file 1 [file cmh-2023-0035-Supplementary-Fig-2.pdf]

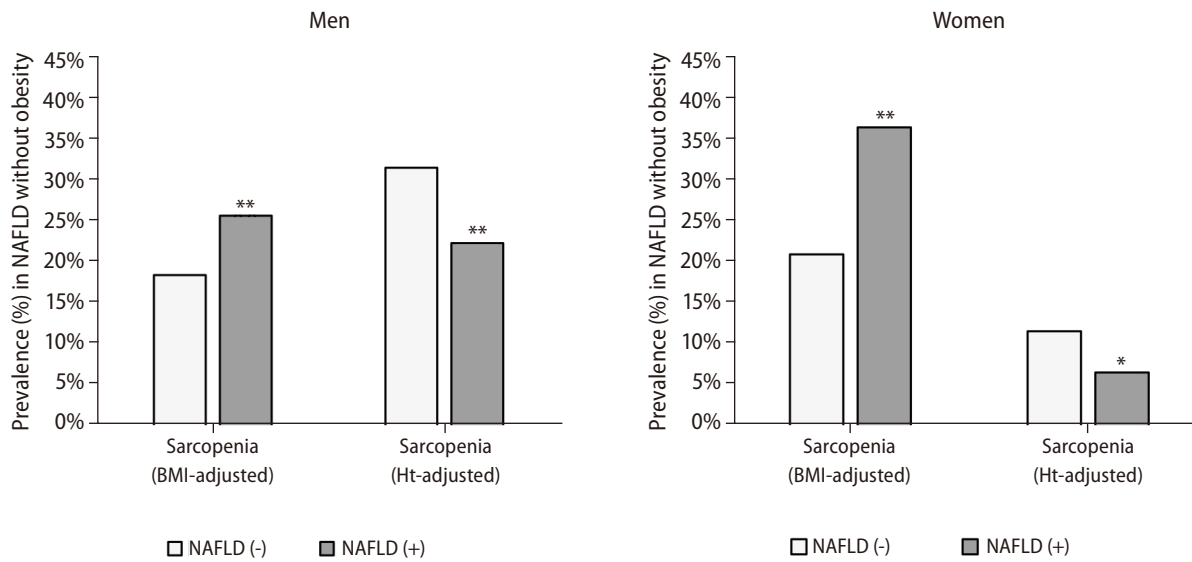

**Supplementary Figure 2.** Prevalence of Visceral fat obesity (VFO), sarcopenia (defined by BMI- or height-adjusted SMA), and myosteatosis in non-obese controls and individuals with NAFLD. Asterisk (\*) denotes comparison between controls and NAFLD without obesity (\*\* $P < 0.001$  and \* $P < 0.05$  by chi-squared test). NAFLD, non-alcoholic fatty liver disease; SMA, skeletal muscle area; BMI, body mass index.
